# Supplementary material for: Virtual screening of anti-HIV1 compounds against SARS-CoV-2: machine learning modeling, chemoinformatics and molecular dynamics simulation based analysis
Source: PubMed Central journal article supplement (PMC7683650; doi:10.1038/s41598-020-77524-x), 2020-11-23
Supplement: 41598_2020_77524_MOESM1_ESM.pdf [file 41598_2020_77524_MOESM1_ESM.pdf]

# Virtual Screening of Anti-HIV1 Compounds against SARS-CoV-2: Machine Learning Modeling, Chemoinformatics and Molecular Dynamics Simulation Based Analysis

Mahesha Nand<sup>1+</sup>, Priyanka Maiti<sup>2+\*</sup>, Tushar Joshi<sup>3</sup>, Subhash Chandra<sup>4\*</sup>, Veena Pande<sup>5</sup>, Jagdish Chandra Kuniyal<sup>6</sup>, MuthannanAndavar Ramakrishnan<sup>7\*</sup>

**Supplementary Table S1** Drug -like properties of compounds screened by DruLiTo

| Pubchem<br>Ids | MW            | logp         | Alogp       | HBA      | HBD      | TPSA          | AMR           | nRB      | nAtom     | nAcidic<br>Group | RC       | nRigidB   | nArom<br>Ring | nHB      | SAAlerts |
|----------------|---------------|--------------|-------------|----------|----------|---------------|---------------|----------|-----------|------------------|----------|-----------|---------------|----------|----------|
| 73157          | 456.18        | 5.123        | 2.367       | 8        | 2        | 119.36        | 119.51        | 10       | 61        | 1                | 3        | 25        | 2             | 10       | 4        |
| 215090         | 196.1         | 2.021        | 0.69        | 2        | 0        | 15.6          | 67.63         | 0        | 27        | 0                | 3        | 17        | 2             | 2        | 0        |
| <b>2301119</b> | <b>325.13</b> | <b>1.896</b> | <b>1.84</b> | <b>5</b> | <b>1</b> | <b>100.63</b> | <b>103.17</b> | <b>2</b> | <b>40</b> | <b>0</b>         | <b>3</b> | <b>25</b> | <b>2</b>      | <b>6</b> | <b>1</b> |
| 638860         | 247.07        | 2.25         | 1.613       | 3        | 1        | 77.62         | 74.82         | 4        | 30        | 0                | 2        | 14        | 2             | 4        | 2        |
| 652480         | 446.18        | 4.614        | 2.908       | 6        | 1        | 91.59         | 138.86        | 9        | 58        | 0                | 4        | 26        | 4             | 7        | 2        |
| 657485         | 333.12        | 1.722        | 1.489       | 7        | 1        | 90.93         | 88.77         | 8        | 43        | 0                | 2        | 17        | 1             | 8        | 3        |
| 661510         | 352.19        | 1.834        | 0.716       | 6        | 0        | 57.5          | 108.92        | 8        | 50        | 0                | 3        | 20        | 3             | 6        | 1        |
| 675749         | 292.02        | 2.139        | 1.73        | 3        | 0        | 32.67         | 76.32         | 2        | 30        | 0                | 2        | 16        | 2             | 3        | 0        |
| 677475         | 271.05        | 1.037        | 1.53        | 4        | 0        | 45.03         | 81.19         | 3        | 29        | 0                | 3        | 18        | 3             | 4        | 1        |
| 708625         | 284.06        | 1.139        | 1.728       | 4        | 1        | 75.99         | 87.43         | 4        | 32        | 0                | 3        | 18        | 3             | 5        | 0        |
| 728528         | 270.05        | 1.73         | 0.753       | 5        | 0        | 61.83         | 76.33         | 3        | 30        | 0                | 3        | 19        | 2             | 5        | 2        |
| 736374         | 244.05        | 2.241        | 0.653       | 4        | 1        | 53.98         | 75.14         | 1        | 26        | 0                | 3        | 18        | 3             | 5        | 1        |
| 738894         | 327.05        | 1.7          | 2.118       | 4        | 2        | 122.31        | 94.4          | 5        | 35        | 0                | 3        | 19        | 2             | 6        | 1        |
| 741948         | 250.11        | 1.978        | 1.941       | 3        | 0        | 32.67         | 82.9          | 2        | 33        | 0                | 3        | 19        | 3             | 3        | 0        |
| 765284         | 279.13        | 2.159        | 0.662       | 3        | 1        | 38.33         | 92.16         | 3        | 38        | 0                | 3        | 20        | 2             | 4        | 1        |
| 778154         | 348.1         | 3.125        | 2.324       | 5        | 2        | 91.15         | 106.9         | 5        | 41        | 0                | 4        | 23        | 4             | 7        | 0        |
| 805223         | 283.08        | 2.144        | 0.081       | 5        | 0        | 55.84         | 84.52         | 4        | 34        | 0                | 3        | 19        | 3             | 5        | 2        |
| 807412         | 284.07        | 2.194        | 0.418       | 5        | 0        | 61.83         | 81.17         | 4        | 33        | 0                | 3        | 19        | 2             | 5        | 2        |

|               |               |              |              |           |          |               |              |           |           |          |          |           |          |           |          |
|---------------|---------------|--------------|--------------|-----------|----------|---------------|--------------|-----------|-----------|----------|----------|-----------|----------|-----------|----------|
| 859639        | 321.06        | 2.684        | 1.955        | 3         | 1        | 71.47         | 90.37        | 6         | 37        | 0        | 2        | 16        | 2        | 4         | 2        |
| 880528        | 254.14        | 3.668        | 0.296        | 3         | 1        | 32.34         | 78.74        | 3         | 37        | 0        | 3        | 18        | 2        | 4         | 1        |
| <b>948801</b> | <b>611.27</b> | <b>3.391</b> | <b>1.985</b> | <b>11</b> | <b>4</b> | <b>147.22</b> | <b>178.8</b> | <b>18</b> | <b>82</b> | <b>0</b> | <b>4</b> | <b>30</b> | <b>4</b> | <b>15</b> | <b>2</b> |
| 970829        | 348.05        | 1.532        | 1.962        | 4         | 1        | 98.54         | 90.71        | 7         | 37        | 0        | 2        | 18        | 2        | 5         | 4        |
| 972394        | 278.14        | -0.22        | 0.508        | 4         | 1        | 78.72         | 75.85        | 5         | 38        | 0        | 2        | 16        | 1        | 5         | 2        |
| 1008368       | 356.08        | 1.823        | 0.652        | 6         | 0        | 85.66         | 104.44       | 4         | 41        | 0        | 4        | 24        | 3        | 6         | 1        |
| 1160939       | 357.01        | 2.417        | 3.273        | 4         | 0        | 120.93        | 107.87       | 3         | 34        | 0        | 4        | 23        | 3        | 4         | 1        |
| 1214257       | 372.01        | 1.458        | 0.745        | 5         | 1        | 74.86         | 99.03        | 5         | 37        | 0        | 2        | 19        | 2        | 6         | 0        |
| 1304219       | 420.11        | 1.9          | 2.942        | 6         | 3        | 119.75        | 128.57       | 9         | 50        | 1        | 3        | 23        | 3        | 9         | 1        |
| 1327906       | 390.1         | 3.184        | 2.94         | 5         | 3        | 110.52        | 122.25       | 8         | 46        | 1        | 3        | 22        | 3        | 8         | 1        |
| 1475477       | 494.04        | 3.652        | 1.922        | 5         | 2        | 92.73         | 123.16       | 11        | 50        | 0        | 2        | 21        | 2        | 7         | 1        |
| 1537038       | 251.07        | 2.034        | 0.843        | 3         | 0        | 29.54         | 73.5         | 4         | 31        | 0        | 2        | 14        | 2        | 3         | 2        |
| 2017227       | 360.04        | 2.014        | 0.869        | 4         | 0        | 40.62         | 103.44       | 5         | 38        | 0        | 3        | 21        | 3        | 4         | 1        |
| 2057118       | 263.09        | 2.265        | 1.55         | 3         | 0        | 37.38         | 86.62        | 3         | 33        | 0        | 3        | 19        | 2        | 3         | 1        |
| 2078229       | 334.13        | 1.748        | 0.639        | 5         | 0        | 49.85         | 105.07       | 3         | 43        | 0        | 4        | 25        | 2        | 5         | 1        |
| 2104090       | 325.1         | 2.904        | 1.926        | 4         | 1        | 44.7          | 100.31       | 5         | 39        | 0        | 3        | 20        | 3        | 5         | 1        |
| 2108058       | 453.1         | 1.751        | 0.563        | 9         | 2        | 115.86        | 128.66       | 6         | 51        | 0        | 5        | 30        | 4        | 11        | 0        |
| 2134372       | 335.04        | 2.27         | 2.322        | 4         | 1        | 71.62         | 93.37        | 5         | 36        | 0        | 2        | 18        | 2        | 5         | 0        |
| 2282752       | 265.11        | 2.216        | 0.856        | 3         | 0        | 37.38         | 84.08        | 4         | 35        | 0        | 3        | 18        | 2        | 3         | 1        |
| 2310813       | 252.09        | 2.237        | 0.737        | 4         | 0        | 41.9          | 80.71        | 3         | 31        | 0        | 3        | 18        | 3        | 4         | 2        |
| 2333509       | 318.11        | 4.409        | 3.37         | 2         | 1        | 37.3          | 104.43       | 4         | 39        | 1        | 3        | 22        | 3        | 3         | 3        |
| 2348921       | 380.03        | 3.122        | 1.324        | 5         | 0        | 64.45         | 103.31       | 3         | 38        | 0        | 4        | 24        | 3        | 5         | 0        |
| 2384236       | 301.12        | 3.433        | 2.858        | 2         | 0        | 20.31         | 95.42        | 8         | 41        | 0        | 2        | 14        | 2        | 2         | 1        |
| 2396278       | 415.06        | 1.52         | 2.392        | 5         | 1        | 83.06         | 121.04       | 7         | 46        | 1        | 3        | 23        | 3        | 6         | 0        |
| 2440506       | 274.11        | 2.357        | 1.108        | 3         | 1        | 45.05         | 92.38        | 3         | 35        | 0        | 3        | 20        | 3        | 4         | 1        |
| 2530053       | 280.02        | 0.97         | 0.617        | 3         | 1        | 41.46         | 77.87        | 4         | 28        | 0        | 2        | 15        | 2        | 4         | 0        |

|         |        |       |       |    |   |        |        |    |    |   |   |    |   |    |   |
|---------|--------|-------|-------|----|---|--------|--------|----|----|---|---|----|---|----|---|
| 2739954 | 427.01 | 2.449 | 1.182 | 4  | 1 | 63.78  | 92.54  | 4  | 36 | 0 | 3 | 26 | 3 | 5  | 3 |
| 2814665 | 327.11 | 1.946 | 0.121 | 6  | 1 | 73.86  | 92.46  | 5  | 41 | 0 | 3 | 21 | 2 | 7  | 2 |
| 2829992 | 443.04 | 4.558 | 4.961 | 4  | 3 | 85.25  | 122.36 | 8  | 47 | 0 | 2 | 20 | 2 | 7  | 3 |
| 2890716 | 307.12 | 3.391 | 2.051 | 2  | 1 | 29.1   | 85.11  | 6  | 38 | 0 | 2 | 17 | 2 | 3  | 1 |
| 2898168 | 269.12 | 1.587 | 2.041 | 2  | 1 | 29.1   | 83.26  | 1  | 36 | 0 | 3 | 21 | 2 | 3  | 1 |
| 2898209 | 400.1  | 2.572 | 2.54  | 4  | 2 | 66.58  | 121.85 | 7  | 48 | 0 | 3 | 22 | 3 | 6  | 0 |
| 2917531 | 265.12 | 1.081 | 2.026 | 4  | 2 | 68.62  | 80.15  | 4  | 37 | 0 | 2 | 15 | 1 | 6  | 1 |
| 2999977 | 266.11 | 2.629 | 1.183 | 4  | 0 | 41.9   | 85     | 3  | 34 | 0 | 3 | 19 | 3 | 4  | 2 |
| 3091264 | 464.96 | 4.16  | 4.553 | 5  | 3 | 94.48  | 120.29 | 10 | 42 | 0 | 2 | 18 | 2 | 8  | 4 |
| 3206295 | 499.19 | 0.251 | 0.849 | 10 | 1 | 105.06 | 147.05 | 12 | 62 | 0 | 5 | 29 | 5 | 11 | 0 |
| 3555173 | 383.1  | 1.566 | 0.065 | 6  | 2 | 74.16  | 110.59 | 5  | 45 | 0 | 4 | 25 | 3 | 8  | 2 |
| 3590295 | 496.1  | 1.36  | 1.521 | 8  | 2 | 117.6  | 141.66 | 8  | 55 | 0 | 4 | 29 | 4 | 10 | 0 |
| 3811656 | 364.06 | 2.313 | 0.555 | 5  | 0 | 76.43  | 102.19 | 6  | 41 | 0 | 3 | 20 | 2 | 5  | 2 |
| 3929515 | 380.15 | 2.878 | 0.846 | 4  | 0 | 49.74  | 123.69 | 3  | 49 | 0 | 5 | 30 | 3 | 4  | 1 |
| 4220289 | 319.07 | 2.555 | 1.401 | 5  | 2 | 131.96 | 85.16  | 7  | 35 | 0 | 2 | 16 | 2 | 7  | 3 |
| 4330749 | 369    | 2.654 | 3.008 | 4  | 1 | 71.62  | 99.06  | 5  | 36 | 0 | 2 | 19 | 2 | 5  | 0 |
| 4437603 | 318.06 | 2.858 | 1.999 | 3  | 0 | 57.97  | 93.19  | 4  | 36 | 0 | 3 | 19 | 2 | 3  | 2 |
| 4621376 | 271.12 | 2.088 | 0.725 | 4  | 0 | 47.89  | 80.12  | 7  | 37 | 0 | 2 | 14 | 2 | 4  | 2 |
| 4679126 | 482.11 | 2.047 | 1.216 | 9  | 1 | 140.03 | 134.89 | 8  | 56 | 0 | 4 | 29 | 3 | 10 | 4 |
| 4794522 | 345.08 | 2.376 | 1.927 | 5  | 1 | 64.63  | 93.03  | 5  | 38 | 0 | 3 | 22 | 2 | 6  | 3 |
| 4868361 | 303.08 | 1.151 | 1.193 | 5  | 2 | 61.44  | 88.13  | 7  | 35 | 0 | 2 | 15 | 2 | 7  | 2 |
| 4907806 | 366.12 | 1.593 | 2.144 | 6  | 1 | 82.51  | 108.2  | 4  | 44 | 0 | 4 | 25 | 4 | 7  | 0 |
| 4961646 | 292.06 | 1.655 | 0.072 | 5  | 0 | 51.13  | 79.64  | 4  | 33 | 0 | 3 | 18 | 2 | 5  | 2 |
| 4961648 | 308.04 | 2.02  | 0.672 | 4  | 0 | 67.2   | 85.81  | 4  | 33 | 0 | 3 | 18 | 2 | 4  | 2 |
| 5349620 | 377.1  | 2.251 | 0.145 | 5  | 0 | 102.11 | 101.83 | 4  | 43 | 0 | 5 | 28 | 2 | 5  | 4 |
| 5928454 | 337.13 | 2.432 | 1.297 | 5  | 0 | 55.84  | 103.3  | 6  | 44 | 0 | 3 | 21 | 2 | 5  | 3 |
| 6268409 | 348.12 | 2.85  | 2.976 | 3  | 1 | 46.53  | 111.31 | 6  | 43 | 1 | 3 | 22 | 3 | 4  | 3 |

|           |        |       |       |    |   |        |        |    |    |   |   |    |   |    |   |
|-----------|--------|-------|-------|----|---|--------|--------|----|----|---|---|----|---|----|---|
| 9563955   | 391.09 | 2.878 | 2.075 | 5  | 2 | 70.56  | 110.23 | 7  | 45 | 0 | 2 | 20 | 2 | 7  | 2 |
| 9566932   | 406.03 | 1.957 | 1.54  | 6  | 1 | 138.72 | 110.78 | 5  | 41 | 0 | 3 | 23 | 2 | 7  | 4 |
| 9566958   | 406.03 | 1.957 | 1.54  | 6  | 1 | 138.72 | 110.78 | 5  | 41 | 0 | 3 | 23 | 2 | 7  | 4 |
| 16682428  | 307.09 | 2.602 | 2.598 | 3  | 2 | 87.53  | 85.19  | 4  | 38 | 0 | 2 | 16 | 2 | 5  | 4 |
| 17379494  | 405.14 | 0.096 | 0.602 | 8  | 1 | 96.56  | 113.79 | 7  | 51 | 0 | 3 | 23 | 2 | 9  | 0 |
| 17584476  | 339.11 | 1.34  | 0.211 | 6  | 0 | 65.07  | 98.46  | 4  | 42 | 0 | 4 | 24 | 2 | 6  | 1 |
| 22583081  | 383.13 | 1.368 | 0.418 | 6  | 0 | 70.59  | 114.1  | 4  | 48 | 0 | 4 | 26 | 3 | 6  | 0 |
| 24761147  | 373.1  | 0.188 | 0.358 | 6  | 1 | 61.88  | 90.2   | 5  | 45 | 0 | 3 | 20 | 1 | 7  | 0 |
| 24789267  | 543.31 | 3.785 | 1.358 | 11 | 4 | 147.22 | 147.98 | 17 | 80 | 0 | 2 | 23 | 2 | 15 | 2 |
| 24791295  | 377.22 | 4.363 | 0.944 | 6  | 2 | 69.09  | 113.39 | 5  | 55 | 0 | 4 | 26 | 3 | 8  | 0 |
| 24819986  | 354.1  | 0.713 | 0.604 | 4  | 1 | 132.61 | 92.74  | 6  | 40 | 0 | 3 | 22 | 3 | 5  | 5 |
| 135549448 | 273.09 | 3.448 | 0.822 | 3  | 0 | 43.87  | 79.55  | 4  | 32 | 0 | 2 | 18 | 2 | 3  | 6 |
| 135549741 | 291.14 | 2.197 | 1.166 | 4  | 2 | 67.48  | 95.71  | 2  | 39 | 0 | 3 | 22 | 2 | 6  | 3 |
| 135549849 | 293.1  | 2.417 | 0.045 | 6  | 2 | 109.58 | 77.25  | 7  | 36 | 0 | 1 | 14 | 1 | 8  | 5 |
| 135550923 | 472.14 | 1.091 | 1.437 | 10 | 2 | 134.78 | 127.11 | 8  | 57 | 0 | 4 | 28 | 2 | 12 | 0 |
| 135599408 | 313.09 | 2.945 | 1.848 | 5  | 1 | 88.35  | 92.02  | 4  | 37 | 0 | 3 | 20 | 2 | 6  | 2 |
| 135614387 | 467.15 | 2.751 | 0.637 | 8  | 2 | 116.68 | 138.01 | 9  | 58 | 0 | 3 | 26 | 3 | 10 | 2 |
| 135615831 | 318.05 | 1.714 | 1.507 | 4  | 1 | 90.91  | 100.83 | 2  | 33 | 0 | 4 | 24 | 4 | 5  | 2 |
| 135650685 | 306.15 | 1.54  | 1.321 | 5  | 1 | 57.06  | 97.65  | 3  | 41 | 0 | 3 | 22 | 2 | 6  | 2 |
| 135735436 | 529.86 | 3.239 | 2.412 | 6  | 2 | 129.51 | 120.5  | 3  | 39 | 0 | 3 | 26 | 2 | 8  | 1 |
| 135795461 | 341.04 | 2.034 | 0.393 | 3  | 1 | 64.2   | 90.55  | 2  | 35 | 0 | 3 | 23 | 2 | 4  | 4 |
| 135802830 | 283.11 | 1.118 | 0     | 2  | 1 | 55.91  | 0      | 4  | 37 | 0 | 2 | 15 | 1 | 3  | 4 |
| 135829849 | 324.15 | 2.28  | 1.145 | 5  | 2 | 70.92  | 102.93 | 7  | 44 | 0 | 2 | 18 | 2 | 7  | 3 |

**Supplementary Table S2** Binding energy of screened ligands with 3CLpro of SARS-CoV-2

| S. No | Compounds CID  | Formula            | Binding affinity (kcal/mol) |
|-------|----------------|--------------------|-----------------------------|
| 1     | <b>948801</b>  | <b>C16H17ClN3O</b> | <b>-7.7</b>                 |
| 2     | 3929515        | C25H20N2O2         | -10.7                       |
| 3     | 4907806        | C19H18N4O2S        | -9.7                        |
| 4     | <b>2301119</b> | <b>C21H14N2O5</b>  | <b>-9.7</b>                 |
| 5     | 135549741      | C18H17N3O          | -9.6                        |
| 6     | 2078229        | C20H18N2O3         | -9.6                        |
| 7     | 3774350        | C17H20N6O3         | -9.6                        |
|       | 3555173        | C20H18ClN3O3       | -9.5                        |
| 8     | 4330749        | C16H13Cl2NO3S      | -9.4                        |
| 9     | 1160939        | C16H15N3OS3        | -9.3                        |
| 10    | 2134372        | C16H14ClNO3S       | -9.1                        |
| 11    | 135549448      | C17H14N3O          | -9.1                        |
| 12    | 2472898        | C16H17F2NO2S2      | -9.1                        |
| 13    | 2348921        | C16H14Cl2N4OS      | -9.0                        |
| 14    | 738894         | C16H16N3OS2        | -9.0                        |
| 15    | 2898168        | C17H16FNO          | -8.9                        |
| 16    | 1214257        | C15H14Cl2N2O3S     | -8.8                        |
| 17    | 4794522        | C18H13F2NO4        | -8.8                        |
| 18    | 1008368        | C19H16N2O4S        | -8.7                        |
| 19    | 859639         | C16H16ClNO2S       | -8.7                        |

|    |           |                |      |
|----|-----------|----------------|------|
| 20 | 4437603   | C16H15CIN2OS   | -8.6 |
| 21 | 135650685 | C19H22N2SN3    | -8.6 |
| 22 | 4220289   | C13H13N5O3S    | -8.4 |
| 23 | 16682428  | C15H19CIN3S    | -8.3 |
| 24 | 2104090   | C17H17CIN2O3S  | -8.3 |
| 25 | 135716604 | C19H11CIF3N3O2 | -8.3 |
| 26 | 880528    | C16H18N2O      | -8.0 |
| 27 | 1537038   | C17H18BrN2O    | -7.1 |
| 28 | 675749    | C13H13BrN2O    | -7.9 |
| 29 | 741948    | C16H14N2O      | -7.9 |
| 30 | 2890716   | C17H16F3NO     | -7.9 |
| 31 | 765284    | C18H18NO2      | -7.9 |
| 32 | 665102    | C17H23N3O2S    | -7.9 |
| 33 | 2440506   | C18H14N2O      | -7.5 |
| 34 | Reference | C27H33N5O2     | -7.4 |
| 35 | 2999977   | 12H19N3O2S3N   | -7.4 |
| 36 | 135616984 | C17H15N4O3     | -7.4 |
| 37 | 2282752   | C17H15NO2      | -7.4 |
| 38 | 5928454   | C14H17F2NO2S2  | -7.3 |
| 39 | 135829849 | C19H22N2O3     | -6.7 |
| 40 | 4621376   | C18H16F3NO     | -6.5 |
| 41 | 135549849 | C19H16N3O      | -6.1 |

**Supplementary Table S3** Scores of screened ligands by deep learning

| <b>Ligands</b> | <b>PubChem IDs</b> | <b>Score</b>  |
|----------------|--------------------|---------------|
| Reference      | Xxj (ref)          | 4.29          |
| Hit-1          | 2898168            | 4.7396        |
| Hit-2          | 741948             | 5.0882        |
| Hit-3          | 2348921            | 5.304         |
| Hit-4          | 2017227            | 5.3106        |
| Hit-5          | 4220289            | 4.319         |
| Hit-6          | 765284             | 4.6551        |
| Hit-7          | 4907806            | 4.9522        |
| Hit-8          | 1008368            | 4.5572        |
| <b>Hit-9</b>   | <b>2301119</b>     | <b>4.612</b>  |
| <b>Hit-10</b>  | <b>948801</b>      | <b>4.5475</b> |
| Hit-11         | 859639             | 4.6563        |
| Hit-12         | 1160939            | 4.3816        |
| Hit-13         | 2134372            | 4.4527        |
| Hit-14         | 17584476           | 4.5652        |
| Hit-15         | 661510             | 4.6767        |
| Hit-16         | 2104090            | 4.8346        |
| Hit-17         | 4437603            | 4.851         |
| Hit-18         | 3811656            | 4.8784        |
| Hit-19         | 2440506            | 4.912         |
| Hit-20         | 2310813            | 5.0713        |
| Hit-21         | 4330749            | 5.0767        |
| Hit-22         | 3555173            | 5.3024        |

**Supplementary Table S4** Details of 12 reference inhibitors used for structural cleft analysis

| <b>Drug or cocktail</b>                                                                                                 | <b>Originator company</b>       | <b>Status and mechanisms</b>                                                                                                                                                                                                     | <b>Clinical trials (trial posting date)</b>                     |
|-------------------------------------------------------------------------------------------------------------------------|---------------------------------|----------------------------------------------------------------------------------------------------------------------------------------------------------------------------------------------------------------------------------|-----------------------------------------------------------------|
| <b>ASC09/ritonavir, lopinavir/ritonavir, with or without umifenovir</b>                                                 | Ascletis, AbbVie, Pharmstandard | ASC09 is an experimental HIV-1 protease inhibitor; ritonavir and lopinavir/ritonavir are approved protease inhibitors for HIV/AIDS; umifenovir is an approved entry inhibitor against influenza                                  | At least three trials (e.g., ChiCTR2000029603, 2/6/20)          |
| <b>SC09/oseltamivir, ritonavir/oseltamivir, oseltamivir</b>                                                             | Ascletis, Gilead, AbbVie        | See above; oseltamivir is a sialidase inhibitor approved for influenza                                                                                                                                                           | One trial (NCT04261270, 2/7/20)                                 |
| <b>Azvodine</b>                                                                                                         | Zhengzhou GranlenPharmaTech     | Experimental reverse transcriptase inhibitor drug against HIV-1/AIDS                                                                                                                                                             | One trial (ChiCTR2000029853, 2/15/20)                           |
| <b>Various combinations of baloxavirmarboxil/favipiravir and lopinavir/ritonavir</b>                                    | Shionogi, Toyama Chemical       | Baloxavirmarboxil is a Cap-dependent endonuclease inhibitor and favipiravir is a guanine analog RNA-dependent RNA polymerase inhibitor approved for influenza A and B; see above                                                 | Two trials (ChiCTR2000029544, 2/3/20; ChiCTR2000029548, 2/4/20) |
| <b>Various combinations of darunavir/cobicistat alone or with lopinavir/ritonavir and thymosin <math>\alpha</math>1</b> | Janssen, Gilead                 | Darunavir and cobicistat are, respectively, an HIV-1 protease inhibitor and inhibitor of cytochrome P450 (CYP) 3A enzyme, approved as a combination against HIV-1/AIDS. Thymosin $\alpha$ 1 is an immune response boosting agent | Two trials (NCT04252274, 2/5/20; ChiCTR2000029541, 2/3/20)      |
| <b>Remdesivir</b>                                                                                                       | Gilead                          | Phosphoramidate prodrug of an adenine analog used for Ebola and Marburg virus outbreaks (similar structure to approved HIV reverse transcriptase inhibitors)                                                                     | Two trials (NCT04252664, 2/5/20; NCT04257656, 2/6/20)           |



|                                                                                          |                                                                                                   |                                                                                                                     |                                                                            |
|------------------------------------------------------------------------------------------|---------------------------------------------------------------------------------------------------|---------------------------------------------------------------------------------------------------------------------|----------------------------------------------------------------------------|
| <b>Chloroquine or hydroxychloroquine</b>                                                 | Shanghai Zhongxi Pharmaceutical,<br>Shanghai Ziyuan Pharmaceutical,<br>Wuhan Wuyao Pharmaceutical | Endosomal acidification fusion inhibitor                                                                            | At least ten trials (e.g., ChiCTR2000029826, 2/2/20; NCT04261517, 2/14/20) |
| <b>Methylprednisolone</b>                                                                | Generic                                                                                           | Synthetic corticosteroid that binds to nuclear receptors to dampen proinflammatory cytokines                        | One trial (NCT04263402, 2/10/20)                                           |
| <b>Interferon alfa-2b alone or in combination with lopinavir/ritonavir and ribavirin</b> | Biogen, Merck                                                                                     | Interferon alfa-2b is a recombinant cytokine with antiviral properties; ribavirin is a guanine derivative; as above | Two trials (NCT04254874, 2/5/20; ChiCTR2000029308, 1/23/20)                |
| <b>Camrelizumab and thymosin</b>                                                         | Incyte, Shanghai Hengrui Pharmaceutical                                                           | Camrelizumab is a humanized monoclonal antibody (mAb) targeting PD-1                                                | Two trials (ChiCTR2000029806, 2/14/20; NCT04268537, 2/14/20)               |
| <b>Cilizumab</b>                                                                         | Chugai Pharmaceutical,<br>Zhejiang Hisun Pharmaceutical,<br>Jiangsu Qyun Bio-Pharmaceutical       | Humanized mAb targeting interleukin-6                                                                               | One trial (ChiCTR2000029765, 2/13/20)                                      |

**Supplementary Table S5** Frequency of functional groups in screened and reference inhibitors

| Ligands   | MF                                                  | MW              | R2NH     | R3N      | ROH      | RCOR     | RCOOR    | ROR      | RCN      | RINGS    | AROMATIC |
|-----------|-----------------------------------------------------|-----------------|----------|----------|----------|----------|----------|----------|----------|----------|----------|
| 17        | C17H16FNO                                           | 269.3134        | 1        | 0        | 0        | 0        | 0        | 0        | 0        | 3        | 2        |
| 20        | C16H14N2O                                           | 250.2952        | 0        | 1        | 0        | 0        | 0        | 0        | 0        | 3        | 3        |
| 21        | C16H14Cl2N4OS                                       | 381.2796        | 0        | 3        | 0        | 0        | 0        | 0        | 0        | 4        | 3        |
| 34        | C18H14Cl2N2O2                                       | 361.2222        | 0        | 2        | 0        | 0        | 0        | 0        | 0        | 3        | 3        |
| 37        | C19H17NO5                                           | 339.342         | 0        | 1        | 0        | 1        | 0        | 3        | 0        | 4        | 2        |
| 42        | C13H13N5O3S                                         | 319.339         | 2        | 0        | 0        | 0        | 0        | 0        | 0        | 2        | 2        |
| 45        | C18H17NO2                                           | 279.3331        | 0        | 0        | 0        | 1        | 0        | 1        | 0        | 3        | 2        |
| 47        | C19H18N4O2S                                         | 366.4368        | 0        | 0        | 0        | 0        | 0        | 0        | 0        | 5        | 1        |
| 61        | C18H16N2O4S                                         | 356.3956        | 0        | 1        | 0        | 0        | 0        | 3        | 0        | 4        | 3        |
| 64        | <b>C20H12N2O5</b>                                   | <b>360.3197</b> | <b>0</b> | <b>0</b> | <b>0</b> | <b>0</b> | <b>1</b> | <b>0</b> | <b>0</b> | <b>4</b> | <b>4</b> |
| 65        | <b>C15H12ClN3O</b>                                  | <b>285.7283</b> | <b>1</b> | <b>1</b> | <b>0</b> | <b>0</b> | <b>0</b> | <b>0</b> | <b>0</b> | <b>3</b> | <b>3</b> |
| 69        | C <sub>16</sub> H <sub>16</sub> ClNO <sub>2</sub> S | 321.8217        | 1        | 0        | 0        | 1        | 0        | 0        | 0        | 2        | 2        |
| Reference | C27H4N5O2                                           | 430.353         | 4        | 1        | 0        | 0        | 0        | 0        | 0        | 4        | 1        |
| Frequency |                                                     |                 | 1.182132 | 0.926809 | 0        | 0.438529 | 0.27735  | 1.126601 | 0        | 0.869718 | 0.869718 |
| GWS       | C13H18N2O                                           | 218.2948        | 1        | 0        | 0        | 0        | 0        | 0        | 0        | 2        | 1        |
| Ref       | C27H32N5O283                                        | 4954.407        | 2        | 1        | 0        | 0        | 0        | 0        | 0        | 4        | 3        |
| RZJ       | C10H14N2O2S                                         | 226.295         | 0        | 1        | 0        | 0        | 0        | 0        | 0        | 2        | 1        |

|           |           |              |         |              |              |   |   |   |              |              |          |
|-----------|-----------|--------------|---------|--------------|--------------|---|---|---|--------------|--------------|----------|
|           |           | 4            |         |              |              |   |   |   |              |              |          |
| RZS       | C8H9N3    | 147.177<br>2 | 1       | 0            | 0            | 0 | 0 | 0 | 1            | 1            | 1        |
| T1J       | C14H13N3O | 239.272<br>5 | 2       | 0            | 1            | 0 | 0 | 0 | 0            | 3            | 2        |
| Frequency |           |              | 0.83666 | 0.54772<br>3 | 0.44721<br>4 | 0 | 0 | 0 | 0.44721<br>4 | 1.14017<br>5 | 0.894427 |

**Supplementary Table S6** Binding energy of hit ligands with different PDB IDs of 3CLpro

| Ligand | PubChem IDs   | 5R811       | 5R82        | 5R84        | 5REC        |
|--------|---------------|-------------|-------------|-------------|-------------|
| Hit-1  | 2898168       | -8.8        | -7.7        | -8.1        | -4.6        |
| Hit-2  | 741948        | -7.7        | -7.5        | -8.2        | -4.3        |
| Hit-3  | 2348921       | -8.8        | -9.1        | -9.5        | -5.3        |
| Hit-4  | 2017227       | -8.9        | -8.5        | -8.6        | -4.8        |
| Hit-5  | 4220289       | -8.2        | -7.8        | -8.2        | -4.7        |
| Hit-6  | 765284        | -8.1        | -7.1        | -8.1        | -4.4        |
| Hit-7  | 4907806       | -9.9        | -9          | -10.1       | -5.9        |
| Hit-8  | 1008368       | -9.2        | -8.4        | -9.2        | -5.4        |
| Hit-9  | 2301119       | -10.1       | -10.4       | -11.1       | -6.4        |
| Hit-10 | <b>948801</b> | <b>-8.2</b> | <b>-8.5</b> | <b>-8.7</b> | <b>-4.6</b> |
| Hit-11 | <b>859639</b> | <b>-9</b>   | <b>-7.8</b> | <b>-8.5</b> | <b>-4.8</b> |
| Hit-12 | Reference     | -6.9        | -4.9        | -2.6        | -1.9        |

**Supplementary Table S7** Interaction profile of screened ligands with 3CLpro

**Hit 9 with 5R81**

**Hydrophobic Interactions**

| Index | Residue | AA  | Distance | Ligand Atom | Protein Atom |
|-------|---------|-----|----------|-------------|--------------|
| 1     | 165A    | MET | 3.46     | 2883        | 1574         |
| 2     | 168A    | PRO | 3.61     | 2893        | 1603         |
| 3     | 189A    | GLN | 3.97     | 2882        | 1791         |
| 4     | 189A    | GLN | 3.71     | 2896        | 1792         |

**Hydrogen Bonds**

| Index | Residue | AA  | Distance H-A | Distance D-A | Donor Angle | Protein donor? | Sidechain | Donor Atom | Acceptor Atom |
|-------|---------|-----|--------------|--------------|-------------|----------------|-----------|------------|---------------|
| 1     | 189A    | GLN | 2.56         | 3.36         | 142.04      | ✗              | ✓         | 2897 [O3]  | 1794 [O2]     |
| 2     | 190A    | THR | 2.38         | 2.85         | 107.21      | ✗              | ✗         | 2874 [Nox] | 1802 [O2]     |
| 3     | 190A    | THR | 3.2          | 4.09         | 149.12      | ✓              | ✗         | 1799 [Nam] | 2871 [O3]     |
| 4     | 192A    | GLN | 3.21         | 3.93         | 129.39      | ✓              | ✓         | 1822 [Nam] | 2874 [Nox]    |

## $\pi$ -Stacking

| Index | Residue | AA  | Distance | Angle | Offset | Type | Ligand Atoms                             |
|-------|---------|-----|----------|-------|--------|------|------------------------------------------|
| 1     | 41A     | HIS | 4.7      | 76.22 | 0.09   | T    | 2878, 2885,<br>2886, 2888,<br>2889, 2890 |

## Hit 10 with 5R81

### Hydrophobic Interactions

| Index | Residue | AA  | Distance | Ligand Atom | Protein Atom |
|-------|---------|-----|----------|-------------|--------------|
| 1     | 108A    | PRO | 3.97     | 2887        | 1051         |
| 2     | 132A    | PRO | 3.81     | 2890        | 1267         |
| 3     | 200A    | ILE | 3.7      | 2891        | 1885         |
| 4     | 202A    | VAL | 3.24     | 2877        | 1902         |
| 5     | 240A    | GLU | 3.72     | 2890        | 2294         |

### Hydrogen Bonds

| Index | Residue | AA  | Distance H-A | Distance D-A | Donor Angle | Protein donor? | Sidechain | Donor Atom    | Acceptor Atom |
|-------|---------|-----|--------------|--------------|-------------|----------------|-----------|---------------|---------------|
| 1     | 108A    | PRO | 2.32         | 2.93         | 168.55      | ✘              | ✘         | 2881<br>[Nam] | 1049<br>[O2]  |
| 2     | 246A    | HIS | 2.54         | 3.23         | 124.41      | ✔              | ✔         | 2354<br>[N3]  | 2883<br>[O2]  |

### $\pi$ -Stacking

| Index | Residue | AA  | Distance | Angle | Offset | Type | Ligand Atoms                             |
|-------|---------|-----|----------|-------|--------|------|------------------------------------------|
| 1     | 246A    | HIS | 4.88     | 82.19 | 1.88   | T    | 2870,<br>2871,<br>2873,<br>2874,<br>2879 |

### Hit 11F with 5R81

### Hydrophobic Interactions

| Index | Residue | AA  | Distance | Ligand Atom | Protein Atom |
|-------|---------|-----|----------|-------------|--------------|
| 1     | 110A    | GLN | 3.64     |             |              |
| 2     | 151A    | ASN | 3.6      | 2889 1063   |              |
| 3     | 151A    | ASN | 3.77     | 2875 1431   |              |
| 4     | 153A    | ASP | 3.59     | 2881 1431   |              |

### Hydrogen Bonds

| Index | Residue | AA  | Distance | H-A      | Donor  | Protein donor? | Sidechain | Donor Atom | Acceptor Atom |
|-------|---------|-----|----------|----------|--------|----------------|-----------|------------|---------------|
| 1     | 158A    | SER | 3.1      | Distance | Donor  | Protein donor? | Sidechain | Donor Atom | Acceptor Atom |
|       |         |     |          | D-A      | Angle  |                |           |            |               |
| 2     | 298A    | ARG | 2.31     | 3.84     | 135.71 |                |           | 1500 [O3]  | 2872 [O2]     |
|       |         |     |          | 2.81     | 108.74 |                |           | 2812 [Ng+] | 2873 [O2]     |

### Halogen Bonds

| Index | Residue | AA  | Distance | Donor Angle | Acceptor Angle | Donor Atom | Acceptor Atom |
|-------|---------|-----|----------|-------------|----------------|------------|---------------|
| 1     | 295A    | ASP | 3.69     | 150.5       | 139.91         | 2870 [Cl]  | 2784 [O2]     |

## Hit 9 with 5R82

### Hydrophobic Interactions

| Index | Residue | AA  | Distance | Ligand Atom | Protein Atom |
|-------|---------|-----|----------|-------------|--------------|
| 1     | 108A    | PRO | 3.48     | 2895        | 1050         |
| 2     | 108A    | PRO | 3.77     | 2896        | 1051         |
| 3     | 132A    | PRO | 3.46     | 2894        | 1267         |
| 4     | 200A    | ILE | 3.57     | 2893        | 1885         |
| 5     | 240A    | GLU | 3.59     | 2893        | 2294         |
| 6     | 249A    | ILE | 3.68     | 2889        | 2381         |

### Hydrogen Bonds

| Index | Residue | AA  | Distance H-A | Distance D-A | Donor Angle | Protein donor? | Sidechain |
|-------|---------|-----|--------------|--------------|-------------|----------------|-----------|
| 1     | 203A    | ASN | 3.32         | 3.79         | 110.64      | ✓              | ✓         |
| 2     | 203A    | ASN | 2.2          | 2.7          | 111.86      | ✗              | ✓         |
| 3     | 246A    | HIS | 3.23         | 3.92         | 126.98      | ✓              | ✓         |

## $\pi$ -Stacking

| Index | Residue | AA  | Distance | Angle | Offset | Type | Ligand Atoms                                      |
|-------|---------|-----|----------|-------|--------|------|---------------------------------------------------|
| 1     | 246A    | HIS | 4.46     | 78.69 | 1.78   | T    | 2870,<br>2877,<br>2879,<br>2883,<br>2884          |
| 2     | 246A    | HIS | 4.34     | 78.73 | 1.46   | T    | 2872,<br>2879,<br>2880,<br>2882,<br>2884,<br>2887 |

## Salt Bridges

| Index | Residue | AA  | Distance | Protein positive? | Ligand Group | Ligand Atoms |
|-------|---------|-----|----------|-------------------|--------------|--------------|
| 1     | 246A    | HIS | 4.28     | ✓                 | Carboxylate  | 2871, 2872   |

## Hit 10 with 5R82

### Hydrophobic Interactions

| Index | Residue | AA  | Distance | Ligand Atom | Protein Atom |
|-------|---------|-----|----------|-------------|--------------|
| 1     | 132A    | PRO | 3.83     | 2887        | 1267         |
| 2     | 200A    | ILE | 3.45     | 2886        | 1885         |
| 3     | 202A    | VAL | 3.69     | 2877        | 1902         |
| 4     | 240A    | GLU | 3.81     | 2887        | 2294         |



### Hydrogen Bonds

| Index | Residue | AA  | Distance<br>H-A | Distance<br>D-A | Donor<br>Angle | Protein<br>donor? | Sidechain | Donor<br>Atom | Acceptor<br>Atom |
|-------|---------|-----|-----------------|-----------------|----------------|-------------------|-----------|---------------|------------------|
| 1     | 108A    | PRO | 2.26            | 2.87            | 168.93         | ✗                 | ✗         | 2881<br>[Nam] | 1049<br>[O2]     |
| 2     | 109A    | GLY | 2.97            | 3.82            | 140.75         | ✗                 | ✗         | 2871<br>[Npl] | 1056<br>[O2]     |
| 3     | 246A    | HIS | 2.77            | 3.35            | 116.72         | ✓                 | ✓         | 2354<br>[N3]  | 2883<br>[O2]     |

### Hit 11 with 5R82

#### Hydrogen Bonds

| Index | Residue | AA  | Distance<br>H-A | Distance<br>D-A | Donor<br>Angle | Protein<br>donor? | Sidechain | Donor<br>Atom | Acceptor<br>Atom |
|-------|---------|-----|-----------------|-----------------|----------------|-------------------|-----------|---------------|------------------|
| 1     | 156B    | ASN | 2.09            | 2.96            | 146.77         |                   |           | 3249<br>[Nam] | 4485<br>[O3]     |
| 2     | 157B    | ASP | 2.56            | 3.36            | 138.91         |                   |           | 4485<br>[O3]  | 3257<br>[O3]     |

#### $\pi$ -Cation Interactions

| Index | Residue | AA  | Distance | Offset | Protein<br>charged? | Ligand<br>Group | Ligand<br>Atoms |
|-------|---------|-----|----------|--------|---------------------|-----------------|-----------------|
| 1     | 43B     | TRP | 4.46     | 1.74   |                     | quartamine      | 4486            |
| 2     | 43B     | TRP | 4.22     | 1      |                     | quartamine      | 4486            |
| 3     | 90B     | TRP | 4.2      | 1.21   |                     | quartamine      | 4486            |
| 4     | 90B     | TRP | 4.23     | 1.33   |                     | quartamine      | 4486            |
| 5     | 119B    | TYR | 4.37     | 0.94   |                     | quartamine      | 4486            |
| 6     | 205B    | TRP | 4.2      | 0.61   |                     | quartamine      | 4486            |
| 7     | 205B    | TRP | 4.45     | 1.58   |                     | quartamine      | 4486            |

#### Salt Bridges

| Index | Residue | AA  | Distance | Protein<br>positive? | Ligand<br>Group | Ligand<br>Atoms |
|-------|---------|-----|----------|----------------------|-----------------|-----------------|
| 1     | 45B     | ASP | 4.77     |                      | Quartamine      | 4486            |

## Hit 9 with 5R84

### Hydrophobic Interactions

| Index | Residue | AA  | Distance | Ligand Atom | Protein Atom |
|-------|---------|-----|----------|-------------|--------------|
| 1     | 108A    | PRO | 3.58     | 2895        | 1050         |
| 2     | 132A    | PRO | 3.25     | 2894        | 1267         |
| 3     | 200A    | ILE | 3.61     | 2893        | 1885         |
| 4     | 240A    | GLU | 3.52     | 2893        | 2294         |
| 5     | 249A    | ILE | 3.52     | 2889        | 2381         |

### Hydrogen Bonds

| Index | Residue | AA  | Distance H-A | Distance D-A | Donor Angle | Protein donor? | Sidechain | Donor Atom | Acceptor Atom |
|-------|---------|-----|--------------|--------------|-------------|----------------|-----------|------------|---------------|
| 1     | 109A    | GLY | 2.6          | 2.94         | 101.28      | ✗              | ✗         | 2897 [O3]  | 1056 [O2]     |
| 2     | 203A    | ASN | 2.63         | 3.26         | 120.5       | ✓              | ✓         | 1912 [Nam] | 3]            |

### $\pi$ -Stacking

| Index | Residue | AA  | Distance | Angle | Offset | Type | Ligand Atoms                       |
|-------|---------|-----|----------|-------|--------|------|------------------------------------|
| 1     | 246A    | HIS | 4.45     | 80.64 | 1.85   | T    | 2872, 2879, 2880, 2882, 2884, 2887 |

### Salt Bridges

| Index | Residue | AA  | Distance | Protein positive? | Ligand Group | Ligand Atoms |
|-------|---------|-----|----------|-------------------|--------------|--------------|
| 1     | 246A    | HIS | 4.29     | ✓                 | Carboxylate  | 2871, 2872   |

## Hit 10 with 5R84

### Hydrophobic Interactions

| Index | Residue | AA  | Distance | Ligand Atom | Protein Atom |
|-------|---------|-----|----------|-------------|--------------|
| 1     | 132A    | PRO | 3.78     | 2890        | 1267         |
| 2     | 240A    | GLU | 3.7      | 2890        | 2294         |

### Hydrogen Bonds

| Index | Residue | AA  | Distance H-A | Distance D-A | Donor Angle | Protein donor? | Sidechain | Donor Atom    | Acceptor Atom |
|-------|---------|-----|--------------|--------------|-------------|----------------|-----------|---------------|---------------|
| 1     | 108A    | PRO | 2.38         | 2.96         | 158.99      | ✗              | ✗         | 2881<br>[Nam] | 1049<br>[O2]  |
| 2     | 109A    | GLY | 2.76         | 3.67         | 148.27      | ✗              | ✗         | 2871<br>[Npl] | 1056<br>[O2]  |
| 3     | 246A    | HIS | 3.02         | 3.57         | 115.25      | ✓              | ✓         | 2354<br>[N3]  | 2883<br>[O2]  |

## Hit 11 with 5R84

### Hydrophobic Interactions

| Index | Residue | AA  | Distance | Ligand Atom | Protein Atom |
|-------|---------|-----|----------|-------------|--------------|
| 1     | 106A    | ILE | 3.49     | 2889        | 1031         |
| 2     | 110A    | GLN | 3.7      | 2889        | 1063         |
| 3     | 151A    | ASN | 3.56     | 2875        | 1431         |
| 4     | 151A    | ASN | 3.87     | 2881        | 1431         |
| 5     | 153A    | ASP | 3.61     | 2879        | 1451         |

### Hydrogen Bonds

| Index | Residue | AA  | Distance H-A | Distance D-A | Donor Angle | Protein donor? | Sidechain | Donor Atom | Acceptor Atom |
|-------|---------|-----|--------------|--------------|-------------|----------------|-----------|------------|---------------|
| 1     | 158A    | SER | 3.06         | 3.81         | 136.49      |                |           | 1500       | 2872          |

|                      |         |     |          |             |                |              | [O3]          | [O2] |
|----------------------|---------|-----|----------|-------------|----------------|--------------|---------------|------|
| 2                    | 298A    | ARG | 2.38     | 2.86        | 107.97         |              | 2812          | 2873 |
|                      |         |     |          |             |                |              | [Ng+]         | [O2] |
| <b>Halogen Bonds</b> |         |     |          |             |                |              |               |      |
| Index                | Residue | AA  | Distance | Donor Angle | Acceptor Angle | Donor Atom   | Acceptor Atom |      |
| 1                    | 295A    | ASP | 3.82     | 154.31      | 137.44         | 2870<br>[Cl] | 2784          | [O2] |

## Hit 9 with 5REC

### Hydrophobic Interactions

| Index | Residue | AA  | Distance | Ligand Atom | Protein Atom |
|-------|---------|-----|----------|-------------|--------------|
| 1     | 245A    | ASP | 3.64     | 2888        | 2340         |

### Hydrogen Bonds

| Index | Residue | AA  | Distance H-A | Distance D-A | Donor Angle | Protein donor? | Sidechain | Donor Atom    | Acceptor Atom |
|-------|---------|-----|--------------|--------------|-------------|----------------|-----------|---------------|---------------|
| 1     | 240A    | GLU | 3.13         | 3.89         | 132.32      | ✘              | ✓         | 2874<br>[Nox] | 2296<br>[O2]  |
| 2     | 243A    | THR | 2.3          | 3.12         | 143.51      | ✓              | ✓         | 2320<br>[O3]  | 2897<br>[O3]  |
| 3     | 245A    | ASP | 3.36         | 4.07         | 134.23      | ✓              | ✓         | 2343<br>[O3]  | 2897<br>[O3]  |
| 4     | 246A    | HIS | 2.71         | 3.5          | 135.66      | ✓              | ✓         | 2354<br>[N3]  | 2870<br>[O2]  |

## Hit 10 with 5REC

### Hydrophobic Interactions

| Index | Residue | AA  | Distance | Ligand Atom | Protein Atom |
|-------|---------|-----|----------|-------------|--------------|
| 1     | 108A    | PRO | 3.68     | 2877        | 1051         |
| 2     | 134A    | PHE | 3.7      | 2891        | 1289         |
| 3     | 134A    | PHE | 3.76     | 2878        | 1290         |

### Hydrogen Bonds

| Index | Residue | AA  | Distance H-A | Distance D-A | Donor Angle | Protein donor? | Sidechain | Donor Atom | Acceptor Atom |
|-------|---------|-----|--------------|--------------|-------------|----------------|-----------|------------|---------------|
| 1     | 132A    | PRO | 2.51         | 3.05         | 148.08      | ✗              | ✗         | 2881 [Nam] | 1265 [O2]     |
| 2     | 240A    | GLU | 2            | 3.01         | 171.9       | ✗              | ✓         | 2871 [Npl] | 2296 [O2]     |

## Hit 11 with 5REC

### Hydrophobic Interactions

| Index | Residue | AA  | Distance | Ligand Atom | Protein Atom |
|-------|---------|-----|----------|-------------|--------------|
| 1     | 202A    | VAL | 3.52     | 2881        | 1902         |
| 2     | 202A    | VAL | 3.57     | 2875        | 1902         |
| 3     | 249A    | ILE | 3.72     | 2889        | 2380         |
| 4     | 249A    | ILE | 3.95     | 2886        | 2381         |
| 5     | 294A    | PHE | 3.5      | 2889        | 2775         |

### Hydrogen Bonds

| Index | Residue | AA  | Distance H-A | Distance D-A | Donor Angle | Protein donor? | Sidechain | Donor Atom | Acceptor Atom |
|-------|---------|-----|--------------|--------------|-------------|----------------|-----------|------------|---------------|
| 1     | 110A    | GLN | 3.56         | 3.98         | 108.4       |                |           | 2874 [Nam] | 1065 [O2]     |

|   |      |     |      |      |        |               |              |
|---|------|-----|------|------|--------|---------------|--------------|
| 2 | 203A | ASN | 3.64 | 4.08 | 108.87 | 1912<br>[Nam] | 2872<br>[O2] |
| 3 | 246A | HIS | 2.36 | 3.19 | 138.73 | 2354<br>[N3]  | 2873<br>[O2] |

## 6W63 with Hit 9

### Hydrophobic Interactions

| Index | Residue | AA  | Distance | Ligand Atom | Protein Atom |
|-------|---------|-----|----------|-------------|--------------|
| 1     | 41A     | HIS | 3.88     | 2900        | 378          |

### Hydrogen Bonds

| Index | Residue | AA  | Distance H-A | Distance D-A | Donor Angle | Protein donor? | Sidechain | Donor Atom    | Acceptor Atom |
|-------|---------|-----|--------------|--------------|-------------|----------------|-----------|---------------|---------------|
| 1     | 54A     | TYR | 3.36         | 4.07         | 127.86      | ✗              | ✓         | 2883<br>[Nox] | 505<br>[O3]   |
| 2     | 189A    | GLN | 2.19         | 2.93         | 144.35      | ✓              | ✓         | 1795<br>[Nam] | 2906 [O3]     |

## 6W63 with Hit 10

### Hydrophobic Interactions

| Index | Residue | AA  | Distance | Ligand Atom | Protein Atom |
|-------|---------|-----|----------|-------------|--------------|
| 1     | 104A    | VAL | 3.75     | 2899        | 1006         |
| 2     | 106A    | ILE | 3.62     | 2896        | 1031         |
| 3     | 110A    | GLN | 3.88     | 2895        | 1063         |
| 4     | 110A    | GLN | 3.99     | 2885        | 1062         |

## Hydrogen Bonds

| Index | Residue | AA  | Distance H-A | Distance D-A | Donor Angle | Protein donor? | Sidechain | Donor Atom | Acceptor Atom |
|-------|---------|-----|--------------|--------------|-------------|----------------|-----------|------------|---------------|
| 1     | 110A    | GLN | 3.19         | 4.05         | 176.21      |                |           | 1066 [Nam] | 2890 [Nam]    |
| 2     | 111A    | THR | 2.67         | 3.49         | 158.87      |                |           | 1070 [Nam] | 2880 [Npl]    |
| 3     | 111A    | THR | 2.86         | 3.30         | 106.32      |                |           | 2880 [Npl] | 1075 [O3]     |

## Halogen Bonds

| Index | Residue | AA  | Distance | Donor Angle | Acceptor Angle | Donor Atom | Acceptor Atom |
|-------|---------|-----|----------|-------------|----------------|------------|---------------|
| 1     | 105A    | ARG | 3.22     | 136.94      | 112.61         | 2898 [Cl]  | 1011 [O2]     |

## 6W63 with Hit 11

### Hydrophobic Interactions

| Index | Residue | AA  | Distance | Ligand Atom | Protein Atom |
|-------|---------|-----|----------|-------------|--------------|
| 1     | 41A     | HIS | 3.74     | 2898        | 378          |
| 2     | 49A     | MET | 3.69     | 2893        | 451          |
| 3     | 165A    | MET | 3.78     | 2891        | 1574         |
| 4     | 189A    | GLN | 3.93     | 2887        | 1791         |

### Halogen Bonds

| Index | Residue | AA  | Distance | Donor Angle | Acceptor Angle | Donor Atom | Acceptor Atom |
|-------|---------|-----|----------|-------------|----------------|------------|---------------|
| 1     | 145A    | CYS | 3.68     | 146.43      | 141.93         | 2879 [Cl]  | 1386 [S3]     |
